# Supplementary material
Source: publisher figshare collection journal article supplement (https://acs.figshare.com/ndownloader/files/4126237)
Supplement: Supplementary file 1 [file 4126237]

 
data_mo_111128c_0m 
  
_audit_creation_method            SHELXL-97 
_chemical_name_systematic 
; 
 ? 
; 
_chemical_name_common             ? 
_chemical_melting_point           ? 
_chemical_formula_moiety          ? 
_chemical_formula_sum 
 'C24 H32 Cl N5 O7' 
_chemical_formula_weight          538.00 
  
loop_ 
 _atom_type_symbol 
 _atom_type_description 
 _atom_type_scat_dispersion_real 
 _atom_type_scat_dispersion_imag 
 _atom_type_scat_source 
 'C'  'C'   0.0033   0.0016 
 'International Tables Vol C Tables 4.2.6.8 and 6.1.1.4' 
 'H'  'H'   0.0000   0.0000 
 'International Tables Vol C Tables 4.2.6.8 and 6.1.1.4' 
 'N'  'N'   0.0061   0.0033 
 'International Tables Vol C Tables 4.2.6.8 and 6.1.1.4' 
 'O'  'O'   0.0106   0.0060 
 'International Tables Vol C Tables 4.2.6.8 and 6.1.1.4' 
 'Cl'  'Cl'   0.1484   0.1585 
 'International Tables Vol C Tables 4.2.6.8 and 6.1.1.4' 
  
_symmetry_cell_setting            Monoclinic 
_symmetry_space_group_name_H-M    P2(1) 
  
loop_ 
 _symmetry_equiv_pos_as_xyz 
 'x, y, z' 
 '-x, y+1/2, -z' 
  
_cell_length_a                    8.2068(8) 
_cell_length_b                    13.7427(13) 
_cell_length_c                    10.9809(11) 
_cell_angle_alpha                 90.00 
_cell_angle_beta                  93.496(2) 
_cell_angle_gamma                 90.00 
_cell_volume                      1236.2(2) 
_cell_formula_units_Z             2 
_cell_measurement_temperature     100(2) 
_cell_measurement_reflns_used     5327 
_cell_measurement_theta_min       2.38 
_cell_measurement_theta_max       31.76 
  
_exptl_crystal_description        ? 
_exptl_crystal_colour             ? 
_exptl_crystal_size_max           0.15 
_exptl_crystal_size_mid           0.13 
_exptl_crystal_size_min           0.10 
_exptl_crystal_density_meas       0 
_exptl_crystal_density_diffrn     1.445 
_exptl_crystal_density_method     'not measured' 
_exptl_crystal_F_000              568 
_exptl_absorpt_coefficient_mu     0.210 
_exptl_absorpt_correction_type    none 
_exptl_absorpt_correction_T_min   0.9691 
_exptl_absorpt_correction_T_max   0.9793 
_exptl_absorpt_process_details    ? 
  
_exptl_special_details 
; 
 ? 
; 
  
_diffrn_ambient_temperature       100(2) 
_diffrn_radiation_wavelength      0.71073 
_diffrn_radiation_type            MoK\a 
_diffrn_radiation_source          'fine-focus sealed tube' 
_diffrn_radiation_monochromator   graphite 
_diffrn_measurement_device_type   'Bruker APEX-II CCD' 
_diffrn_measurement_method        '\f and \w scans' 
_diffrn_detector_area_resol_mean  ? 
_diffrn_reflns_number             9889 
_diffrn_reflns_av_R_equivalents   0.0205 
_diffrn_reflns_av_sigmaI/netI     0.0373 
_diffrn_reflns_limit_h_min        -9 
_diffrn_reflns_limit_h_max        10 
_diffrn_reflns_limit_k_min        -17 
_diffrn_reflns_limit_k_max        18 
_diffrn_reflns_limit_l_min        -14 
_diffrn_reflns_limit_l_max        14 
_diffrn_reflns_theta_min          1.86 
_diffrn_reflns_theta_max          28.00 
_reflns_number_total              5757 
_reflns_number_gt                 5424 
_reflns_threshold_expression      >2sigma(I) 
  
_computing_data_collection        'Bruker APEX2' 
_computing_cell_refinement        'Bruker SAINT' 
_computing_data_reduction         'Bruker SAINT' 
_computing_structure_solution     'SHELXS-97 (Sheldrick, 2008)' 
_computing_structure_refinement   'SHELXL-97 (Sheldrick, 2008)' 
_computing_molecular_graphics     'Bruker SHELXTL' 
_computing_publication_material   'Bruker SHELXTL' 
  
_refine_special_details 
; 
 Refinement of F^2^ against ALL reflections.  The weighted R-factor wR and 
 goodness of fit S are based on F^2^, conventional R-factors R are based 
 on F, with F set to zero for negative F^2^. The threshold expression of 
 F^2^ > 2sigma(F^2^) is used only for calculating R-factors(gt) etc. and is 
 not relevant to the choice of reflections for refinement.  R-factors based 
 on F^2^ are statistically about twice as large as those based on F, and R- 
 factors based on ALL data will be even larger. 
; 
  
_refine_ls_structure_factor_coef  Fsqd 
_refine_ls_matrix_type            full 
_refine_ls_weighting_scheme       calc 
_refine_ls_weighting_details 
 'calc w=1/[\s^2^(Fo^2^)+(0.0795P)^2^+0.3503P] where P=(Fo^2^+2Fc^2^)/3' 
_atom_sites_solution_primary      direct 
_atom_sites_solution_secondary    difmap 
_atom_sites_solution_hydrogens    geom 
_refine_ls_hydrogen_treatment     mixed 
_refine_ls_extinction_method      none 
_refine_ls_extinction_coef        ? 
_refine_ls_abs_structure_details 
 'Flack H D (1983), Acta Cryst. A39, 876-881' 
_refine_ls_abs_structure_Flack    0.05(6) 
_refine_ls_number_reflns          5757 
_refine_ls_number_parameters      338 
_refine_ls_number_restraints      1 
_refine_ls_R_factor_all           0.0461 
_refine_ls_R_factor_gt            0.0427 
_refine_ls_wR_factor_ref          0.1274 
_refine_ls_wR_factor_gt           0.1205 
_refine_ls_goodness_of_fit_ref    1.092 
_refine_ls_restrained_S_all       1.092 
_refine_ls_shift/su_max           0.003 
_refine_ls_shift/su_mean          0.000 
  
loop_ 
 _atom_site_label 
 _atom_site_type_symbol 
 _atom_site_fract_x 
 _atom_site_fract_y 
 _atom_site_fract_z 
 _atom_site_U_iso_or_equiv 
 _atom_site_adp_type 
 _atom_site_occupancy 
 _atom_site_symmetry_multiplicity 
 _atom_site_calc_flag 
 _atom_site_refinement_flags 
 _atom_site_disorder_assembly 
 _atom_site_disorder_group 
C1 C 0.6016(3) 0.9398(2) 0.91924(19) 0.0198(4) Uani 1 1 d . . . 
C2 C 0.6164(3) 0.86143(19) 0.8407(2) 0.0223(5) Uani 1 1 d . . . 
H2 H 0.6856 0.8078 0.8615 0.027 Uiso 1 1 calc R . . 
C3 C 0.5250(3) 0.86540(18) 0.7303(2) 0.0216(5) Uani 1 1 d . . . 
H3 H 0.5319 0.8142 0.6727 0.026 Uiso 1 1 calc R . . 
C4 C 0.4232(3) 0.94451(19) 0.70397(18) 0.0183(4) Uani 1 1 d . . . 
C5 C 0.4197(3) 1.01872(17) 0.7904(2) 0.0196(4) Uani 1 1 d . . . 
H5 H 0.3517 1.0735 0.7727 0.023 Uiso 1 1 calc R . . 
C6 C 0.3083(3) 0.9492(2) 0.58985(19) 0.0205(5) Uani 1 1 d . . . 
H6A H 0.2261 0.8967 0.5930 0.025 Uiso 1 1 calc R . . 
H6B H 0.2498 1.0122 0.5880 0.025 Uiso 1 1 calc R . . 
C7 C 0.5368(3) 1.00347(17) 0.4635(2) 0.0184(4) Uani 1 1 d . . . 
H7A H 0.5811 0.9923 0.3828 0.022 Uiso 1 1 calc R . . 
H7B H 0.6238 0.9881 0.5270 0.022 Uiso 1 1 calc R . . 
C8 C 0.4874(3) 1.10988(19) 0.4744(2) 0.0240(5) Uani 1 1 d . . . 
H8A H 0.4047 1.1259 0.4093 0.036 Uiso 1 1 calc R . . 
H8B H 0.5834 1.1514 0.4670 0.036 Uiso 1 1 calc R . . 
H8C H 0.4424 1.1208 0.5539 0.036 Uiso 1 1 calc R . . 
C9 C 0.3434(3) 0.87607(17) 0.38965(19) 0.0161(4) Uani 1 1 d . . . 
C11 C 0.3837(3) 0.78426(18) 0.18977(19) 0.0178(4) Uani 1 1 d . . . 
H11A H 0.4464 0.8124 0.1241 0.021 Uiso 1 1 calc R . . 
H11B H 0.3974 0.7127 0.1888 0.021 Uiso 1 1 calc R . . 
C12 C 0.1309(3) 0.78587(19) 0.28138(18) 0.0190(4) Uani 1 1 d . . . 
H12A H 0.1658 0.7208 0.3117 0.023 Uiso 1 1 calc R . . 
H12B H 0.0109 0.7856 0.2656 0.023 Uiso 1 1 calc R . . 
C13 C 0.0637(3) 0.9419(2) 0.3799(2) 0.0234(5) Uani 1 1 d . . . 
H13A H 0.1213 0.9998 0.4120 0.035 Uiso 1 1 calc R . . 
H13B H -0.0211 0.9236 0.4347 0.035 Uiso 1 1 calc R . . 
H13C H 0.0132 0.9561 0.2987 0.035 Uiso 1 1 calc R . . 
C14 C 0.1253(3) 0.77740(18) 0.05654(19) 0.0172(4) Uani 1 1 d . . . 
H14 H 0.0276 0.8202 0.0418 0.021 Uiso 1 1 calc R . . 
C15 C 0.0642(3) 0.67233(18) 0.05880(19) 0.0179(4) Uani 1 1 d . . . 
C16 C -0.1352(3) 0.56636(19) -0.0359(2) 0.0221(5) Uani 1 1 d . . . 
H16A H -0.1750 0.5406 0.0411 0.027 Uiso 1 1 calc R . . 
H16B H -0.0500 0.5219 -0.0636 0.027 Uiso 1 1 calc R . . 
C17 C -0.2739(3) 0.5741(2) -0.1316(2) 0.0264(5) Uani 1 1 d . . . 
H17A H -0.2320 0.6018 -0.2068 0.032 Uiso 1 1 calc R . . 
H17B H -0.3154 0.5079 -0.1512 0.032 Uiso 1 1 calc R . . 
C18 C 0.2353(3) 0.79222(18) -0.05154(19) 0.0176(4) Uani 1 1 d . . . 
H18A H 0.2719 0.8609 -0.0523 0.021 Uiso 1 1 calc R . . 
H18B H 0.3335 0.7508 -0.0387 0.021 Uiso 1 1 calc R . . 
C19 C 0.1517(3) 0.76812(17) -0.17437(18) 0.0171(4) Uani 1 1 d . . . 
C20 C 0.1987(3) 0.68671(18) -0.2378(2) 0.0196(4) Uani 1 1 d . . . 
H20 H 0.2854 0.6473 -0.2045 0.024 Uiso 1 1 calc R . . 
C21 C 0.1204(3) 0.66166(18) -0.3503(2) 0.0192(4) Uani 1 1 d . . . 
H21 H 0.1546 0.6059 -0.3931 0.023 Uiso 1 1 calc R . . 
C22 C -0.0071(3) 0.71853(17) -0.39927(19) 0.0170(4) Uani 1 1 d . . . 
C23 C -0.0541(3) 0.80191(18) -0.3366(2) 0.0187(4) Uani 1 1 d . . . 
H23 H -0.1404 0.8416 -0.3701 0.022 Uiso 1 1 calc R . . 
C24 C 0.0254(3) 0.82637(18) -0.22561(19) 0.0183(4) Uani 1 1 d . . . 
H24 H -0.0062 0.8833 -0.1840 0.022 Uiso 1 1 calc R . . 
Cl1 Cl 0.71059(7) 0.93725(5) 1.06103(5) 0.02695(14) Uani 1 1 d . . . 
N1 N 0.5082(3) 1.01642(16) 0.89773(18) 0.0210(4) Uani 1 1 d . . . 
N2 N 0.3966(2) 0.93881(16) 0.47760(15) 0.0172(3) Uani 1 1 d . . . 
N3 N 0.2107(2) 0.80960(15) 0.17041(16) 0.0181(4) Uani 1 1 d . . . 
N4 N 0.1799(2) 0.86137(15) 0.37161(16) 0.0182(4) Uani 1 1 d . . . 
C10 C 0.4450(3) 0.82468(17) 0.31192(18) 0.0152(4) Uani 1 1 d . . . 
N6 N 0.6024(2) 0.79944(14) 0.34609(16) 0.0163(4) Uani 1 1 d . . . 
O2 O 0.6674(2) 0.81862(13) 0.45227(14) 0.0199(3) Uani 1 1 d . . . 
O3 O 0.6828(2) 0.75253(13) 0.27200(15) 0.0223(3) Uani 1 1 d . . . 
O4 O 0.1249(2) 0.60682(14) 0.11927(16) 0.0251(4) Uani 1 1 d . . . 
O5 O -0.0692(2) 0.66334(13) -0.01707(15) 0.0204(3) Uani 1 1 d . . . 
O6 O -0.4043(2) 0.63213(14) -0.09579(18) 0.0280(4) Uani 1 1 d . . . 
H6 H -0.4897 0.5984 -0.0962 0.042 Uiso 1 1 calc R . . 
O7 O -0.0812(2) 0.69066(14) -0.50827(14) 0.0213(3) Uani 1 1 d . . . 
H7 H -0.1588 0.7287 -0.5272 0.032 Uiso 1 1 calc R . . 
O8 O 0.0878(6) 0.5396(3) 0.3663(4) 0.1014(14) Uani 1 1 d . . . 
H8D H 0.0399 0.5824 0.4021 0.152 Uiso 1 1 d R . . 
H8E H 0.0985 0.5585 0.2964 0.152 Uiso 1 1 d R . . 
  
loop_ 
 _atom_site_aniso_label 
 _atom_site_aniso_U_11 
 _atom_site_aniso_U_22 
 _atom_site_aniso_U_33 
 _atom_site_aniso_U_23 
 _atom_site_aniso_U_13 
 _atom_site_aniso_U_12 
C1 0.0170(9) 0.0259(12) 0.0164(9) 0.0024(10) 0.0001(7) -0.0050(10) 
C2 0.0200(11) 0.0209(11) 0.0263(11) 0.0019(9) 0.0044(9) 0.0013(9) 
C3 0.0227(11) 0.0212(12) 0.0213(10) -0.0036(9) 0.0049(9) -0.0027(9) 
C4 0.0171(9) 0.0231(11) 0.0150(9) -0.0021(9) 0.0035(7) -0.0050(9) 
C5 0.0182(10) 0.0198(11) 0.0208(10) -0.0005(9) 0.0019(8) -0.0021(8) 
C6 0.0166(9) 0.0302(13) 0.0148(9) -0.0044(9) 0.0017(7) -0.0049(9) 
C7 0.0170(10) 0.0174(11) 0.0211(10) -0.0015(8) 0.0033(8) -0.0038(8) 
C8 0.0246(12) 0.0195(11) 0.0285(12) -0.0022(10) 0.0061(10) -0.0011(9) 
C9 0.0166(10) 0.0168(10) 0.0148(9) 0.0023(8) -0.0001(7) -0.0031(8) 
C11 0.0140(9) 0.0229(11) 0.0160(9) -0.0032(8) -0.0033(7) -0.0005(8) 
C12 0.0190(10) 0.0254(11) 0.0125(9) -0.0025(8) -0.0010(7) -0.0070(9) 
C13 0.0179(10) 0.0300(13) 0.0221(10) -0.0009(10) 0.0005(8) 0.0034(10) 
C14 0.0146(9) 0.0222(11) 0.0144(9) -0.0005(8) -0.0020(7) 0.0007(8) 
C15 0.0144(9) 0.0250(12) 0.0143(9) -0.0014(8) 0.0012(7) -0.0016(8) 
C16 0.0201(11) 0.0205(11) 0.0253(11) -0.0005(9) -0.0023(9) -0.0034(9) 
C17 0.0255(12) 0.0270(13) 0.0258(12) -0.0035(10) -0.0067(10) -0.0058(10) 
C18 0.0156(9) 0.0235(11) 0.0132(9) 0.0003(8) -0.0022(7) -0.0017(8) 
C19 0.0145(9) 0.0239(12) 0.0128(9) 0.0017(8) -0.0002(7) -0.0054(8) 
C20 0.0157(10) 0.0248(12) 0.0181(10) 0.0016(9) -0.0016(8) 0.0015(9) 
C21 0.0153(10) 0.0227(11) 0.0194(10) -0.0014(9) -0.0006(8) 0.0001(9) 
C22 0.0131(10) 0.0240(12) 0.0137(9) 0.0018(8) -0.0003(7) -0.0037(8) 
C23 0.0151(10) 0.0229(12) 0.0176(9) 0.0008(8) -0.0025(7) 0.0017(8) 
C24 0.0184(10) 0.0223(11) 0.0140(9) -0.0004(8) -0.0003(8) -0.0024(8) 
Cl1 0.0249(3) 0.0343(3) 0.0210(2) 0.0034(2) -0.00427(19) -0.0029(3) 
N1 0.0219(10) 0.0220(10) 0.0192(9) -0.0036(8) 0.0015(7) -0.0037(8) 
N2 0.0151(8) 0.0225(9) 0.0142(7) -0.0029(8) 0.0019(6) -0.0056(8) 
N3 0.0136(8) 0.0268(11) 0.0136(8) -0.0009(7) -0.0020(6) -0.0019(7) 
N4 0.0145(9) 0.0236(10) 0.0162(8) -0.0022(7) -0.0020(6) -0.0039(7) 
C10 0.0154(9) 0.0165(10) 0.0132(9) 0.0001(8) -0.0035(7) -0.0011(8) 
N6 0.0174(9) 0.0168(9) 0.0144(8) 0.0007(7) -0.0027(6) -0.0016(7) 
O2 0.0208(8) 0.0214(8) 0.0163(7) -0.0012(6) -0.0088(6) 0.0007(6) 
O3 0.0208(8) 0.0255(9) 0.0201(8) -0.0026(6) -0.0013(6) 0.0040(7) 
O4 0.0266(9) 0.0253(9) 0.0227(8) -0.0010(7) -0.0051(7) 0.0020(7) 
O5 0.0174(8) 0.0219(9) 0.0213(7) 0.0002(6) -0.0040(6) -0.0069(6) 
O6 0.0215(9) 0.0278(10) 0.0341(10) 0.0100(8) -0.0046(7) -0.0018(7) 
O7 0.0179(8) 0.0289(9) 0.0162(7) -0.0033(7) -0.0044(6) 0.0024(7) 
O8 0.142(4) 0.083(3) 0.080(3) 0.002(2) 0.015(3) 0.006(3) 
  
_geom_special_details 
; 
 All esds (except the esd in the dihedral angle between two l.s. planes) 
 are estimated using the full covariance matrix.  The cell esds are taken 
 into account individually in the estimation of esds in distances, angles 
 and torsion angles; correlations between esds in cell parameters are only 
 used when they are defined by crystal symmetry.  An approximate (isotropic) 
 treatment of cell esds is used for estimating esds involving l.s. planes. 
; 
  
loop_ 
 _geom_bond_atom_site_label_1 
 _geom_bond_atom_site_label_2 
 _geom_bond_distance 
 _geom_bond_site_symmetry_2 
 _geom_bond_publ_flag 
C1 N1 1.316(3) . ? 
C1 C2 1.390(4) . ? 
C1 Cl1 1.748(2) . ? 
C2 C3 1.387(3) . ? 
C2 H2 0.9500 . ? 
C3 C4 1.390(4) . ? 
C3 H3 0.9500 . ? 
C4 C5 1.395(3) . ? 
C4 C6 1.523(3) . ? 
C5 N1 1.346(3) . ? 
C5 H5 0.9500 . ? 
C6 N2 1.474(3) . ? 
C6 H6A 0.9900 . ? 
C6 H6B 0.9900 . ? 
C7 N2 1.470(3) . ? 
C7 C8 1.524(3) . ? 
C7 H7A 0.9900 . ? 
C7 H7B 0.9900 . ? 
C8 H8A 0.9800 . ? 
C8 H8B 0.9800 . ? 
C8 H8C 0.9800 . ? 
C9 N2 1.347(3) . ? 
C9 N4 1.359(3) . ? 
C9 C10 1.417(3) . ? 
C11 N3 1.465(3) . ? 
C11 C10 1.509(3) . ? 
C11 H11A 0.9900 . ? 
C11 H11B 0.9900 . ? 
C12 N3 1.455(3) . ? 
C12 N4 1.474(3) . ? 
C12 H12A 0.9900 . ? 
C12 H12B 0.9900 . ? 
C13 N4 1.468(3) . ? 
C13 H13A 0.9800 . ? 
C13 H13B 0.9800 . ? 
C13 H13C 0.9800 . ? 
C14 N3 1.464(3) . ? 
C14 C15 1.529(3) . ? 
C14 C18 1.548(3) . ? 
C14 H14 1.0000 . ? 
C15 O4 1.208(3) . ? 
C15 O5 1.341(3) . ? 
C16 O5 1.449(3) . ? 
C16 C17 1.505(3) . ? 
C16 H16A 0.9900 . ? 
C16 H16B 0.9900 . ? 
C17 O6 1.411(3) . ? 
C17 H17A 0.9900 . ? 
C17 H17B 0.9900 . ? 
C18 C19 1.512(3) . ? 
C18 H18A 0.9900 . ? 
C18 H18B 0.9900 . ? 
C19 C20 1.385(3) . ? 
C19 C24 1.400(3) . ? 
C20 C21 1.400(3) . ? 
C20 H20 0.9500 . ? 
C21 C22 1.388(3) . ? 
C21 H21 0.9500 . ? 
C22 O7 1.364(3) . ? 
C22 C23 1.403(3) . ? 
C23 C24 1.389(3) . ? 
C23 H23 0.9500 . ? 
C24 H24 0.9500 . ? 
C10 N6 1.367(3) . ? 
N6 O3 1.257(3) . ? 
N6 O2 1.280(2) . ? 
O6 H6 0.8400 . ? 
O7 H7 0.8400 . ? 
O8 H8D 0.8200 . ? 
O8 H8E 0.8200 . ? 
  
loop_ 
 _geom_angle_atom_site_label_1 
 _geom_angle_atom_site_label_2 
 _geom_angle_atom_site_label_3 
 _geom_angle 
 _geom_angle_site_symmetry_1 
 _geom_angle_site_symmetry_3 
 _geom_angle_publ_flag 
N1 C1 C2 125.5(2) . . ? 
N1 C1 Cl1 115.89(18) . . ? 
C2 C1 Cl1 118.59(19) . . ? 
C3 C2 C1 116.7(2) . . ? 
C3 C2 H2 121.7 . . ? 
C1 C2 H2 121.7 . . ? 
C2 C3 C4 119.9(2) . . ? 
C2 C3 H3 120.1 . . ? 
C4 C3 H3 120.1 . . ? 
C3 C4 C5 117.9(2) . . ? 
C3 C4 C6 122.5(2) . . ? 
C5 C4 C6 119.4(2) . . ? 
N1 C5 C4 123.1(2) . . ? 
N1 C5 H5 118.5 . . ? 
C4 C5 H5 118.5 . . ? 
N2 C6 C4 111.87(17) . . ? 
N2 C6 H6A 109.2 . . ? 
C4 C6 H6A 109.2 . . ? 
N2 C6 H6B 109.2 . . ? 
C4 C6 H6B 109.2 . . ? 
H6A C6 H6B 107.9 . . ? 
N2 C7 C8 110.98(19) . . ? 
N2 C7 H7A 109.4 . . ? 
C8 C7 H7A 109.4 . . ? 
N2 C7 H7B 109.4 . . ? 
C8 C7 H7B 109.4 . . ? 
H7A C7 H7B 108.0 . . ? 
C7 C8 H8A 109.5 . . ? 
C7 C8 H8B 109.5 . . ? 
H8A C8 H8B 109.5 . . ? 
C7 C8 H8C 109.5 . . ? 
H8A C8 H8C 109.5 . . ? 
H8B C8 H8C 109.5 . . ? 
N2 C9 N4 118.2(2) . . ? 
N2 C9 C10 125.0(2) . . ? 
N4 C9 C10 116.72(19) . . ? 
N3 C11 C10 108.00(18) . . ? 
N3 C11 H11A 110.1 . . ? 
C10 C11 H11A 110.1 . . ? 
N3 C11 H11B 110.1 . . ? 
C10 C11 H11B 110.1 . . ? 
H11A C11 H11B 108.4 . . ? 
N3 C12 N4 106.68(19) . . ? 
N3 C12 H12A 110.4 . . ? 
N4 C12 H12A 110.4 . . ? 
N3 C12 H12B 110.4 . . ? 
N4 C12 H12B 110.4 . . ? 
H12A C12 H12B 108.6 . . ? 
N4 C13 H13A 109.5 . . ? 
N4 C13 H13B 109.5 . . ? 
H13A C13 H13B 109.5 . . ? 
N4 C13 H13C 109.5 . . ? 
H13A C13 H13C 109.5 . . ? 
H13B C13 H13C 109.5 . . ? 
N3 C14 C15 114.32(18) . . ? 
N3 C14 C18 110.13(18) . . ? 
C15 C14 C18 110.10(19) . . ? 
N3 C14 H14 107.3 . . ? 
C15 C14 H14 107.3 . . ? 
C18 C14 H14 107.3 . . ? 
O4 C15 O5 124.5(2) . . ? 
O4 C15 C14 126.0(2) . . ? 
O5 C15 C14 109.46(19) . . ? 
O5 C16 C17 107.2(2) . . ? 
O5 C16 H16A 110.3 . . ? 
C17 C16 H16A 110.3 . . ? 
O5 C16 H16B 110.3 . . ? 
C17 C16 H16B 110.3 . . ? 
H16A C16 H16B 108.5 . . ? 
O6 C17 C16 113.6(2) . . ? 
O6 C17 H17A 108.9 . . ? 
C16 C17 H17A 108.9 . . ? 
O6 C17 H17B 108.9 . . ? 
C16 C17 H17B 108.9 . . ? 
H17A C17 H17B 107.7 . . ? 
C19 C18 C14 113.66(18) . . ? 
C19 C18 H18A 108.8 . . ? 
C14 C18 H18A 108.8 . . ? 
C19 C18 H18B 108.8 . . ? 
C14 C18 H18B 108.8 . . ? 
H18A C18 H18B 107.7 . . ? 
C20 C19 C24 118.79(19) . . ? 
C20 C19 C18 120.0(2) . . ? 
C24 C19 C18 121.2(2) . . ? 
C19 C20 C21 121.0(2) . . ? 
C19 C20 H20 119.5 . . ? 
C21 C20 H20 119.5 . . ? 
C22 C21 C20 119.9(2) . . ? 
C22 C21 H21 120.1 . . ? 
C20 C21 H21 120.1 . . ? 
O7 C22 C21 117.8(2) . . ? 
O7 C22 C23 122.6(2) . . ? 
C21 C22 C23 119.6(2) . . ? 
C24 C23 C22 120.0(2) . . ? 
C24 C23 H23 120.0 . . ? 
C22 C23 H23 120.0 . . ? 
C23 C24 C19 120.8(2) . . ? 
C23 C24 H24 119.6 . . ? 
C19 C24 H24 119.6 . . ? 
C1 N1 C5 117.0(2) . . ? 
C9 N2 C7 122.20(18) . . ? 
C9 N2 C6 120.49(19) . . ? 
C7 N2 C6 117.21(18) . . ? 
C12 N3 C14 115.55(17) . . ? 
C12 N3 C11 107.86(17) . . ? 
C14 N3 C11 117.47(18) . . ? 
C9 N4 C13 121.2(2) . . ? 
C9 N4 C12 115.41(19) . . ? 
C13 N4 C12 114.89(18) . . ? 
N6 C10 C9 122.77(18) . . ? 
N6 C10 C11 114.10(19) . . ? 
C9 C10 C11 122.84(19) . . ? 
O3 N6 O2 119.27(18) . . ? 
O3 N6 C10 118.50(18) . . ? 
O2 N6 C10 122.16(18) . . ? 
C15 O5 C16 117.23(19) . . ? 
C17 O6 H6 109.5 . . ? 
C22 O7 H7 109.5 . . ? 
H8D O8 H8E 107.7 . . ? 
  
loop_ 
 _geom_torsion_atom_site_label_1 
 _geom_torsion_atom_site_label_2 
 _geom_torsion_atom_site_label_3 
 _geom_torsion_atom_site_label_4 
 _geom_torsion 
 _geom_torsion_site_symmetry_1 
 _geom_torsion_site_symmetry_2 
 _geom_torsion_site_symmetry_3 
 _geom_torsion_site_symmetry_4 
 _geom_torsion_publ_flag 
N1 C1 C2 C3 0.4(4) . . . . ? 
Cl1 C1 C2 C3 178.58(17) . . . . ? 
C1 C2 C3 C4 -1.0(3) . . . . ? 
C2 C3 C4 C5 1.2(3) . . . . ? 
C2 C3 C4 C6 -174.3(2) . . . . ? 
C3 C4 C5 N1 -0.9(3) . . . . ? 
C6 C4 C5 N1 174.8(2) . . . . ? 
C3 C4 C6 N2 -57.4(3) . . . . ? 
C5 C4 C6 N2 127.2(2) . . . . ? 
N3 C14 C15 O4 -28.7(3) . . . . ? 
C18 C14 C15 O4 95.9(3) . . . . ? 
N3 C14 C15 O5 151.02(18) . . . . ? 
C18 C14 C15 O5 -84.4(2) . . . . ? 
O5 C16 C17 O6 -63.2(3) . . . . ? 
N3 C14 C18 C19 -175.49(19) . . . . ? 
C15 C14 C18 C19 57.5(3) . . . . ? 
C14 C18 C19 C20 -110.1(2) . . . . ? 
C14 C18 C19 C24 69.4(3) . . . . ? 
C24 C19 C20 C21 -1.0(3) . . . . ? 
C18 C19 C20 C21 178.4(2) . . . . ? 
C19 C20 C21 C22 -0.5(3) . . . . ? 
C20 C21 C22 O7 -179.1(2) . . . . ? 
C20 C21 C22 C23 1.4(3) . . . . ? 
O7 C22 C23 C24 179.7(2) . . . . ? 
C21 C22 C23 C24 -0.8(3) . . . . ? 
C22 C23 C24 C19 -0.6(3) . . . . ? 
C20 C19 C24 C23 1.5(3) . . . . ? 
C18 C19 C24 C23 -177.9(2) . . . . ? 
C2 C1 N1 C5 0.0(3) . . . . ? 
Cl1 C1 N1 C5 -178.27(17) . . . . ? 
C4 C5 N1 C1 0.3(3) . . . . ? 
N4 C9 N2 C7 -142.9(2) . . . . ? 
C10 C9 N2 C7 35.9(3) . . . . ? 
N4 C9 N2 C6 33.3(3) . . . . ? 
C10 C9 N2 C6 -147.9(2) . . . . ? 
C8 C7 N2 C9 120.7(2) . . . . ? 
C8 C7 N2 C6 -55.6(3) . . . . ? 
C4 C6 N2 C9 131.6(2) . . . . ? 
C4 C6 N2 C7 -52.0(3) . . . . ? 
N4 C12 N3 C14 -151.58(19) . . . . ? 
N4 C12 N3 C11 74.7(2) . . . . ? 
C15 C14 N3 C12 -46.4(3) . . . . ? 
C18 C14 N3 C12 -170.9(2) . . . . ? 
C15 C14 N3 C11 82.8(2) . . . . ? 
C18 C14 N3 C11 -41.7(3) . . . . ? 
C10 C11 N3 C12 -47.3(2) . . . . ? 
C10 C11 N3 C14 -179.99(19) . . . . ? 
N2 C9 N4 C13 38.5(3) . . . . ? 
C10 C9 N4 C13 -140.4(2) . . . . ? 
N2 C9 N4 C12 -175.0(2) . . . . ? 
C10 C9 N4 C12 6.0(3) . . . . ? 
N3 C12 N4 C9 -52.7(3) . . . . ? 
N3 C12 N4 C13 95.9(2) . . . . ? 
N2 C9 C10 N6 28.6(4) . . . . ? 
N4 C9 C10 N6 -152.5(2) . . . . ? 
N2 C9 C10 C11 -157.8(2) . . . . ? 
N4 C9 C10 C11 21.0(3) . . . . ? 
N3 C11 C10 N6 174.99(18) . . . . ? 
N3 C11 C10 C9 0.9(3) . . . . ? 
C9 C10 N6 O3 178.9(2) . . . . ? 
C11 C10 N6 O3 4.8(3) . . . . ? 
C9 C10 N6 O2 1.7(3) . . . . ? 
C11 C10 N6 O2 -172.33(19) . . . . ? 
O4 C15 O5 C16 -6.1(3) . . . . ? 
C14 C15 O5 C16 174.16(18) . . . . ? 
C17 C16 O5 C15 -175.3(2) . . . . ? 
  
loop_ 
 _geom_hbond_atom_site_label_D 
 _geom_hbond_atom_site_label_H 
 _geom_hbond_atom_site_label_A 
 _geom_hbond_distance_DH 
 _geom_hbond_distance_HA 
 _geom_hbond_distance_DA 
 _geom_hbond_angle_DHA 
 _geom_hbond_site_symmetry_A 
O8 H8D O7  0.82 2.07 2.892(5) 179.8 1_556 
O8 H8E O4  0.82 2.08 2.899(4) 179.8 . 
O6 H6 N1  0.84 2.47 2.865(3) 110.1 2_546 
O6 H6 Cl1  0.84 2.90 3.708(2) 161.4 2_546 
O7 H7 O2  0.84 1.89 2.725(2) 172.4 1_454 
O7 H7 O3  0.84 2.51 3.119(2) 130.0 1_454 
O7 H7 N6  0.84 2.53 3.321(2) 157.8 1_454 
  
_diffrn_measured_fraction_theta_max    0.994 
_diffrn_reflns_theta_full              28.00 
_diffrn_measured_fraction_theta_full   0.994 
_refine_diff_density_max    0.370 
_refine_diff_density_min   -0.807 
_refine_diff_density_rms    0.079 
